# Supplementary material for: Mapping the mammalian ribosome quality control complex interactome using proximity labeling approaches
Source: PubMed Central journal article supplement — Mol Biol Cell. 2018 May 15;29(10):1258–69. doi: 10.1091/mbc.E17-12-0714 (PMC5935074; doi:10.1091/mbc.e17-12-0714), 2018-05-15
Supplement: mbc-29-1258-s001.pdf [file mbc-29-1258-s001.pdf]

# Supplemental Materials

*Molecular Biology of the Cell*

Zuzow et al.

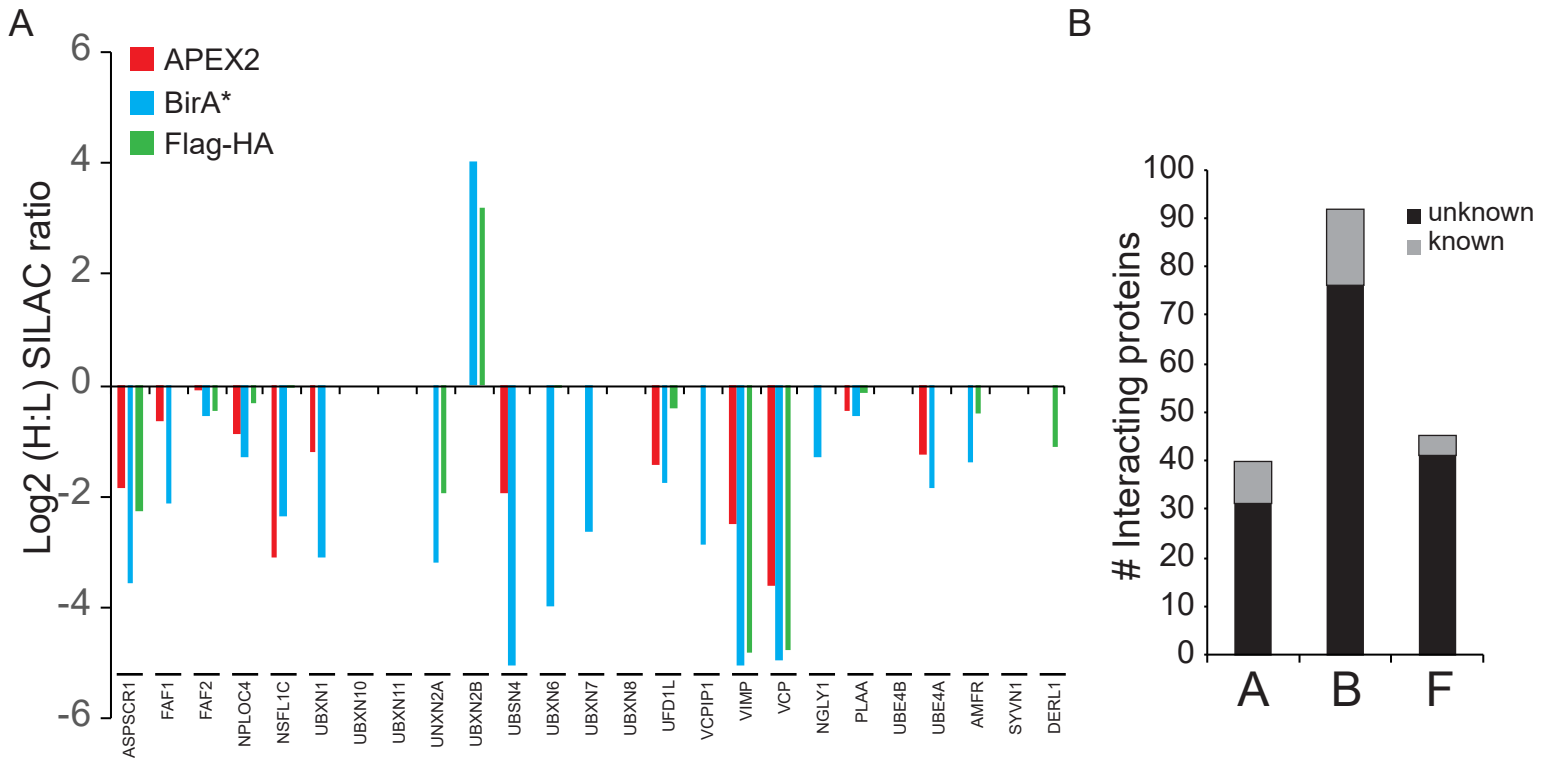

**Figure S1 – Evaluation of known p97/VCP interacting proteins across the three proteomic platforms.**

A) Heavy-labeled GFP expressing control cells were mixed with light-labeled VCP expressing cells that were similarly tagged as indicated. Depicted is the log<sub>2</sub> heavy to light (H:L) ratios of all known p97/VCP interacting proteins identified from APEX2 (red), BirA\* (blue), or Flag-HA (green) expressing cell extracts.

B) The total number of identified p97/VCP interacting proteins for each of the three proteomic platforms (A=APEX2, B=BioID, F=Flag-HA). The fraction of known p97/VCP interacting proteins identified by each proteomic approach is shaded in grey.
